# Supplementary material
Source: Royal Society of Chemistry journal article supplement (doi:10.1039/d5np00090d)
Supplement: d5np00090d1.pdf [file d5np00090d1.pdf]

**Supplementary information**

**A Comprehensive Review of Structural Diversity, Biosynthesis and Chemical Synthesis of *Lasiodiplodia* spp. Natural Products**

Maria Michela Salvatore, Marco Masi, Marina DellaGreca and Anna Andolfi

Table S1. Main bioactivities of compounds from *Lasiodiplodia* spp.

| Compound (Code)                                                                                                                                | Bioactivity                          | Concentration                                                                                                                                                                                                                                                                                                                                                                                             | Further details                                                                                                                                                                                                                                                                                                                                                                                                                                                                                 | Ref. |
|------------------------------------------------------------------------------------------------------------------------------------------------|--------------------------------------|-----------------------------------------------------------------------------------------------------------------------------------------------------------------------------------------------------------------------------------------------------------------------------------------------------------------------------------------------------------------------------------------------------------|-------------------------------------------------------------------------------------------------------------------------------------------------------------------------------------------------------------------------------------------------------------------------------------------------------------------------------------------------------------------------------------------------------------------------------------------------------------------------------------------------|------|
| Theobroxide (1)                                                                                                                                | Potato micro-tuber-inducing activity | 10 <sup>-5</sup> M                                                                                                                                                                                                                                                                                                                                                                                        | <i>S. tuberosum</i>                                                                                                                                                                                                                                                                                                                                                                                                                                                                             | 1    |
|                                                                                                                                                | Phytotoxic                           | 0.5 mM                                                                                                                                                                                                                                                                                                                                                                                                    | Seed of <i>N. tabacum</i> (growth inhibition)                                                                                                                                                                                                                                                                                                                                                                                                                                                   | 2    |
| (4 <i>S</i> ,5 <i>S</i> )-4,5-Dihydroxy-2-methyl-cyclohex-2-enone (2)                                                                          | Phytotoxic                           | 0.5 mM                                                                                                                                                                                                                                                                                                                                                                                                    | Seed of <i>N. tabacum</i> (growth inhibition)                                                                                                                                                                                                                                                                                                                                                                                                                                                   | 2    |
| (4 <i>R</i> ,5 <i>R</i> )-4,5-Dihydroxy-3-methylcyclohex-2-enone (3)                                                                           | Phytotoxic                           | 0.5 mM                                                                                                                                                                                                                                                                                                                                                                                                    | Seed of <i>N. tabacum</i> (growth inhibition)                                                                                                                                                                                                                                                                                                                                                                                                                                                   | 2    |
| (4 <i>S</i> ,5 <i>S</i> )-4,5-Dihydroxy-3-methylcyclohex-2-enone (4)                                                                           | Phytotoxic                           | 0.5 mM                                                                                                                                                                                                                                                                                                                                                                                                    | Seed of <i>N. tabacum</i> (growth inhibition)                                                                                                                                                                                                                                                                                                                                                                                                                                                   | 2    |
|                                                                                                                                                | Potato micro-tuber-inducing activity | 10 <sup>-3</sup> M                                                                                                                                                                                                                                                                                                                                                                                        | <i>S. tuberosum</i>                                                                                                                                                                                                                                                                                                                                                                                                                                                                             | 3    |
| (3 <i>aR</i> ,4 <i>S</i> ,5 <i>R</i> ,7 <i>aS</i> )-4,5-Dihydroxy-6-methyl-3 <i>a</i> ,4,5,7 <i>a</i> -tetrahydrobenzo[d][1,3]dioxol-2-one (5) | Potato micro-tuber-inducing activity | 10 <sup>-3</sup> M                                                                                                                                                                                                                                                                                                                                                                                        | <i>S. tuberosum</i>                                                                                                                                                                                                                                                                                                                                                                                                                                                                             | 4    |
| (3 <i>aS</i> ,4 <i>R</i> ,5 <i>S</i> ,7 <i>aR</i> )-4,5-Dihydroxy-7-methyl-3 <i>a</i> ,4,5,7 <i>a</i> -tetrahydrobenzo[1,3]dioxol-2-one (6)    | Potato micro-tuber-inducing activity | 10 <sup>-3</sup> M                                                                                                                                                                                                                                                                                                                                                                                        | <i>S. tuberosum</i>                                                                                                                                                                                                                                                                                                                                                                                                                                                                             | 3    |
| Aldsulfon (7)                                                                                                                                  | Antibacterial                        | 2.5 µg mL <sup>-1</sup><br>16 µg mL <sup>-1</sup><br>6 µg mL <sup>-1</sup>                                                                                                                                                                                                                                                                                                                                | <i>M. haemolytica</i> KB345 (MIC)<br><i>M. haemolytica</i> KB346 (MIC)<br><i>P. multocida</i> KB348 (MIC)                                                                                                                                                                                                                                                                                                                                                                                       | 5    |
| Cyclo-(Trp-Ala) (11)                                                                                                                           | Cytotoxic                            | 1 mg mL <sup>-1</sup><br>1 mg mL <sup>-1</sup>                                                                                                                                                                                                                                                                                                                                                            | Vero (cell viability: 70%)<br>3T3 (cell viability: 70%)                                                                                                                                                                                                                                                                                                                                                                                                                                         | 6    |
| Lasiodipline E (17)                                                                                                                            | Antibacterial                        | 0.25 µg mL <sup>-1</sup><br>32.0 µg mL <sup>-1</sup><br>0.12 µg mL <sup>-1</sup><br>0.12 µg mL <sup>-1</sup><br>0.12 µg mL <sup>-1</sup>                                                                                                                                                                                                                                                                  | <i>V. parvula</i> (MIC)<br><i>A. israelii</i> (MIC)<br><i>Streptococcus</i> sp. (MIC)<br><i>B. vulgatus</i> (MIC)<br><i>Peptostreptococcus</i> sp. (MIC)                                                                                                                                                                                                                                                                                                                                        | 7    |
| Lasiodipline G (19)                                                                                                                            | Cytotoxic                            | 5.8 µM<br>8.4 µM<br>6.3 µM<br>3.9 µM<br>3.9 µM<br>2.9 µM<br>12.6 µM                                                                                                                                                                                                                                                                                                                                       | L929 (IC <sub>50</sub> )<br>KB3.1 (IC <sub>50</sub> )<br>PC-3 (IC <sub>50</sub> )<br>MCF-7 (IC <sub>50</sub> )<br>SKOV-3 (IC <sub>50</sub> )<br>A431 (IC <sub>50</sub> )<br>A549 (IC <sub>50</sub> )                                                                                                                                                                                                                                                                                            | 8    |
|                                                                                                                                                | Antibacterial                        | 87.4 µM                                                                                                                                                                                                                                                                                                                                                                                                   | <i>S. aureus</i> (MIC)                                                                                                                                                                                                                                                                                                                                                                                                                                                                          |      |
| Lasiosan (30)                                                                                                                                  | Immunomodulatory                     | 100 ng mL <sup>-1</sup><br>100 ng mL <sup>-1</sup>                                                                                                                                                                                                                                                                                                                                                        | NO production (70.2%)<br>ROS production (82.4%)                                                                                                                                                                                                                                                                                                                                                                                                                                                 | 9    |
|                                                                                                                                                | Anti-biofilm                         |                                                                                                                                                                                                                                                                                                                                                                                                           | <i>S. aureus</i> MTCC96 (inhibition: 88.2%)<br><i>S. aureus</i> MLS16 MTCC 2940 (inhibition: 89.2%)<br><i>B. subtilis</i> MTCC 121 (inhibition: 75.0%)<br><i>M. luteus</i> MTCC 2470 (inhibition: 90.2%)<br><i>K. planticola</i> MTCC 530 (inhibition: 80.8%)<br><i>E. coli</i> MTCC 739 (inhibition: 78.9%)<br><i>P. aeruginosa</i> MTCC 2453 (inhibition: 60.0%)<br><i>C. violaceum</i> MTCC 2526 (inhibition: 80.0%)                                                                         | 9    |
|                                                                                                                                                | Ergosterol biosynthesis inhibitory   | 10 ng mL <sup>-1</sup><br>10 ng mL <sup>-1</sup><br>10 ng mL <sup>-1</sup><br>10 ng mL <sup>-1</sup>                                                                                                                                                                                                                                                                                                      | <i>C. albicans</i> MTCC183 (content: 60%)<br><i>C. albicans</i> MTCC127 (content: 60%)<br><i>C. albicans</i> MTCC854 (content: 60%)<br><i>C. albicans</i> MTCC4748 (content: 77%)<br><i>C. albicans</i> MTCC7315 (content: 65%)                                                                                                                                                                                                                                                                 | 9    |
|                                                                                                                                                | Antimicrobial                        | 9.37 µg mL <sup>-1</sup><br>9.37 µg mL <sup>-1</sup><br>9.37 µg mL <sup>-1</sup><br>18.75 µg mL <sup>-1</sup><br>9.37 µg mL <sup>-1</sup><br>9.37 µg mL <sup>-1</sup><br>9.37 µg mL <sup>-1</sup><br>9.37 µg mL <sup>-1</sup><br>18.75 µg mL <sup>-1</sup><br>9.37 µg mL <sup>-1</sup><br>9.37 µg mL <sup>-1</sup><br>18.75 µg mL <sup>-1</sup><br>18.75 µg mL <sup>-1</sup><br>18.75 µg mL <sup>-1</sup> | <i>S. aureus</i> MTCC96 (MIC)<br><i>S. aureus</i> MLS16 MTCC 2940 (MIC)<br><i>S. aureus</i> ATCC 6538P (MIC)<br><i>B. subtilis</i> MTCC 121 (MIC)<br><i>M. luteus</i> MTCC 2470 (MIC)<br><i>K. planticola</i> MTCC 530 (MIC)<br><i>E. coli</i> MTCC 739 (MIC)<br><i>P. aeruginosa</i> MTCC 2453 (MIC)<br><i>C. violaceum</i> MTCC 2526 (MIC)<br><i>E. fecalis</i> MTCC2729 (MIC)<br><i>A. viscosus</i> ATCC 15987 (MIC)<br><i>C. albicans</i> MTCC183 (MIC)<br><i>C. albicans</i> MTCC127 (MIC) | 9    |

|                                              |                                      |                                                                                                                                                                                                                                        |                                                                                                                                                                                                                                                                                                                                                                          |    |
|----------------------------------------------|--------------------------------------|----------------------------------------------------------------------------------------------------------------------------------------------------------------------------------------------------------------------------------------|--------------------------------------------------------------------------------------------------------------------------------------------------------------------------------------------------------------------------------------------------------------------------------------------------------------------------------------------------------------------------|----|
|                                              |                                      | 18.75 $\mu\text{g mL}^{-1}$<br>18.75 $\mu\text{g mL}^{-1}$<br>18.75 $\mu\text{g mL}^{-1}$                                                                                                                                              | <i>C. albicans</i> MTCC854 (MIC)<br><i>C. albicans</i> MTCC4748 (MIC)<br><i>C. albicans</i> MTCC7315 (MIC)                                                                                                                                                                                                                                                               |    |
| Lasiodiplodan (31)                           | Antiviral                            | 7 $\mu\text{g mL}^{-1}$                                                                                                                                                                                                                | hRSV in Hep-2 (CC <sub>50</sub> )                                                                                                                                                                                                                                                                                                                                        | 10 |
|                                              | Cytotoxic                            | 100 $\mu\text{g mL}^{-1}$                                                                                                                                                                                                              | MCF-7 (IC <sub>50</sub> )                                                                                                                                                                                                                                                                                                                                                | 11 |
|                                              | Cytotoxic                            | 14.2 $\mu\text{g mL}^{-1}$                                                                                                                                                                                                             | Hep-2 (CC <sub>50</sub> )                                                                                                                                                                                                                                                                                                                                                | 10 |
| Botryosphaerans (32)                         | Anticoagulant                        | 1-20 mg mL <sup>-1</sup>                                                                                                                                                                                                               | Activated partial thromboplastin time (65.5-54.7s)<br>Thrombin time (15.6-13.5s)<br>Prothrombin time (15.7-19.8s)                                                                                                                                                                                                                                                        | 12 |
|                                              | Anticlastogenic                      | 15-30 mg Kg <sup>-1</sup>                                                                                                                                                                                                              | Polychromatic erythrocytes of bone marrow and reticulocytes in peripheral blood (frequency: 78-82%)                                                                                                                                                                                                                                                                      | 13 |
|                                              | Hypoglycemic                         | 12 mg Kg <sup>-1</sup>                                                                                                                                                                                                                 | Diabetic rats                                                                                                                                                                                                                                                                                                                                                            | 14 |
|                                              | Hypocholesterolemic                  | 12 mg Kg <sup>-1</sup>                                                                                                                                                                                                                 | Hyperlipidemic rats                                                                                                                                                                                                                                                                                                                                                      | 14 |
|                                              | Toxicological                        | 1.25-125 mg Kg <sup>-1</sup>                                                                                                                                                                                                           | Rats                                                                                                                                                                                                                                                                                                                                                                     | 15 |
| Methyl hexadecanoate (35)                    | Plant growth regulation              | 0.2 mg mL <sup>-1</sup>                                                                                                                                                                                                                | Seeds of <i>N. tabacum</i>                                                                                                                                                                                                                                                                                                                                               | 16 |
| Ethyl hexadecanoate (36)                     | Plant growth regulation              | 0.2 mg mL <sup>-1</sup>                                                                                                                                                                                                                | Seeds of <i>N. tabacum</i>                                                                                                                                                                                                                                                                                                                                               | 16 |
| 2-Methylpropyl hexadecanoate (37)            | Plant growth regulation              | 0.2 mg mL <sup>-1</sup>                                                                                                                                                                                                                | Seeds of <i>N. tabacum</i>                                                                                                                                                                                                                                                                                                                                               | 16 |
| 9-Methyl (Z)-9-octadecenoate (42)            | Plant growth regulation              | 0.2 mg mL <sup>-1</sup>                                                                                                                                                                                                                | Seeds of <i>N. tabacum</i>                                                                                                                                                                                                                                                                                                                                               | 16 |
| Ethyl octadecenoate (43)                     | Plant growth regulation              | 0.2 mg mL <sup>-1</sup>                                                                                                                                                                                                                | Seeds of <i>N. tabacum</i>                                                                                                                                                                                                                                                                                                                                               | 16 |
| Ethyl (Z)-9-octadecenoate (44)               | Plant growth regulation              | 0.2 mg mL <sup>-1</sup>                                                                                                                                                                                                                | Seeds of <i>N. tabacum</i>                                                                                                                                                                                                                                                                                                                                               | 16 |
| Ethyl (E)-9-octadecenoate (45)               | Plant growth regulation              | 0.2 mg mL <sup>-1</sup>                                                                                                                                                                                                                | Seeds of <i>N. tabacum</i>                                                                                                                                                                                                                                                                                                                                               | 16 |
| Methyl (Z,Z)-9,12-octadecadienoate (47)      | Plant growth regulation              | 0.2 mg mL <sup>-1</sup>                                                                                                                                                                                                                | Seed of <i>N. tabacum</i>                                                                                                                                                                                                                                                                                                                                                | 16 |
| Ethyl-(Z,Z)-9,12-octadecadienoate (48)       | Plant growth regulation              | 0.2 mg mL <sup>-1</sup>                                                                                                                                                                                                                | Seed of <i>N. tabacum</i>                                                                                                                                                                                                                                                                                                                                                | 16 |
| Ethyl-(Z,Z,Z)-9,12,15-octadecatrienoate (51) | Plant growth regulation              | 0.2 mg mL <sup>-1</sup>                                                                                                                                                                                                                | Seed of <i>N. tabacum</i>                                                                                                                                                                                                                                                                                                                                                | 16 |
| Indole-3-carbaldehyde (55)                   | Phytotoxic                           | 2500-156.25 $\mu\text{g mL}^{-1}$                                                                                                                                                                                                      | Leaves of <i>B. graminis</i> (Disease severity: ~85%)                                                                                                                                                                                                                                                                                                                    | 17 |
| Indole-3-carboxylic acid (56)                | Phytotoxic                           | 1 mg mL <sup>-1</sup>                                                                                                                                                                                                                  | Leaves of <i>S. lycopersicum</i> (2.3 mm)                                                                                                                                                                                                                                                                                                                                | 6  |
|                                              | Cytotoxic                            | 0.5 mg mL <sup>-1</sup><br>1 mg mL <sup>-1</sup>                                                                                                                                                                                       | Vero (cell viability: 55%)<br>3T3 (cell viability: 60%)                                                                                                                                                                                                                                                                                                                  |    |
|                                              | Phytotoxic                           | 2500-156.25 $\mu\text{g mL}^{-1}$                                                                                                                                                                                                      | Leaves of <i>B. graminis</i> (Disease severity: ~85%)                                                                                                                                                                                                                                                                                                                    | 17 |
| (-)-Mellein (58)                             | Cytotoxic                            | 124.8 $\mu\text{g mL}^{-1}$<br>248.5 $\mu\text{g mL}^{-1}$                                                                                                                                                                             | MCF-7 (IC <sub>50</sub> )<br>CV-1 (IC <sub>50</sub> )                                                                                                                                                                                                                                                                                                                    | 18 |
|                                              | Antibacterial                        | > 128 $\mu\text{g mL}^{-1}$<br>> 128 $\mu\text{g mL}^{-1}$                                                                                                                                                                             | <i>S. aureus</i> ATCC 25922 (MIC)<br><i>S. aureus</i> MRSA (MIC)                                                                                                                                                                                                                                                                                                         | 19 |
|                                              | Potato micro-tuber-inducing activity | 10 <sup>-4</sup> M                                                                                                                                                                                                                     | <i>S. tuberosum</i>                                                                                                                                                                                                                                                                                                                                                      | 1  |
|                                              | Phytotoxic                           | 1 mg mL <sup>-1</sup>                                                                                                                                                                                                                  | Leaves of <i>T. procumbens</i> (inhibition: 100%)<br>Leaves of <i>S. italica</i> (inhibition: 56.7%)<br>Leaves of <i>L. perenne</i> (inhibition: 25%)<br>Leaves of <i>Bromus</i> sp. (inhibition: 21.6%)<br>Leaves of <i>C. dactylon</i> (inhibition: 53.3%)<br>Leaves of <i>A. compressus</i> (inhibition: 58.3%)<br>Leaves of <i>Valerianaceae</i> (inhibition: 66.7%) | 20 |
|                                              | Bioherbicidal                        | 0.1-2.5 mg mL <sup>-1</sup>                                                                                                                                                                                                            | <i>Echinochloa crusgalli</i> and cowpea                                                                                                                                                                                                                                                                                                                                  |    |
|                                              | Antimicrobial                        | 1.9 $\mu\text{g mL}^{-1}$<br>3.9 $\mu\text{g mL}^{-1}$<br>3.9 $\mu\text{g mL}^{-1}$<br>15.6 $\mu\text{g mL}^{-1}$<br>7.8 $\mu\text{g mL}^{-1}$<br>7.8 $\mu\text{g mL}^{-1}$<br>15.6 $\mu\text{g mL}^{-1}$<br>7.8 $\mu\text{g mL}^{-1}$ | <i>M. luteus</i> MTCC 2470 (MIC)<br><i>S. aureus</i> MTCC 96 (MIC)<br><i>B. subtilis</i> MTCC 121 (MIC)<br><i>E. coli</i> MTCC 739 (MIC)<br><i>P. aeruginosa</i> MTCC 2453 (MIC)<br><i>K. planticola</i> MTCC 530 (MIC)<br><i>C. albicans</i> MTCC 3017 (MIC)<br><i>C. albicans</i> MTCC 3018 (MIC)                                                                      | 21 |

|                                                                                                                            |                                      |                                                                                                                                                                                                                                                                                                                                       |                                                                                                                                                                                                                                                                                                                                                                                                                                                                                                                                                                                                                                                                         |    |
|----------------------------------------------------------------------------------------------------------------------------|--------------------------------------|---------------------------------------------------------------------------------------------------------------------------------------------------------------------------------------------------------------------------------------------------------------------------------------------------------------------------------------|-------------------------------------------------------------------------------------------------------------------------------------------------------------------------------------------------------------------------------------------------------------------------------------------------------------------------------------------------------------------------------------------------------------------------------------------------------------------------------------------------------------------------------------------------------------------------------------------------------------------------------------------------------------------------|----|
|                                                                                                                            |                                      | 7.8 µg mL <sup>-1</sup><br>1.9 µg mL <sup>-1</sup><br>1.9 µg mL <sup>-1</sup><br>7.8 µg mL <sup>-1</sup><br>1.9 µg mL <sup>-1</sup><br>7.8 µg mL <sup>-1</sup><br>15.6 µg mL <sup>-1</sup><br>31.25 µg mL <sup>-1</sup><br>7.8 µg mL <sup>-1</sup><br>3.9 µg mL <sup>-1</sup><br>3.9 µg mL <sup>-1</sup><br>31.25 µg mL <sup>-1</sup> | <i>C. glabrata</i> MTCC 3019 (MIC)<br><i>X. oryzae</i> pv. <i>oryzae</i> BXO43 (MIC)<br><i>X. oryzae</i> pv. <i>oryzicola</i> Y2 (MIC)<br><i>X. oryzae</i> pv. <i>oryzae</i> TNAU-2 (MIC)<br><i>X. campestris</i> pv. <i>vesicatoria</i> XIS (MIC)<br><i>X. campestris</i> pv. <i>vesicatoria</i> 65-10 (MIC)<br><i>X. campestris</i> pv. <i>vesicatoria</i> 85-10 (MIC)<br><i>X. campestris</i> pv. <i>vesicatoria</i> 8004 (MIC)<br><i>X. campestris</i> pv. <i>citri</i> C1 (MIC)<br><i>X. campestris</i> pv. <i>campestris</i> TNAU-1 (MIC)<br><i>X. campestris</i> pv. <i>campestris</i> MTCC 2286 (MIC)<br><i>X. axonopodis</i> pv. <i>malvaceum</i> TNAU-3 (MIC) |    |
| (-)-(3 <i>R</i> ,4 <i>R</i> )-4-Hydroxymellein (59)                                                                        | Antibacterial                        | > 128 µg mL <sup>-1</sup><br>> 128 µg mL <sup>-1</sup>                                                                                                                                                                                                                                                                                | <i>S. aureus</i> ATCC 25922 (MIC)<br><i>S. aureus</i> MRSA (MIC)                                                                                                                                                                                                                                                                                                                                                                                                                                                                                                                                                                                                        | 19 |
| (-)-(3 <i>R</i> ,4 <i>S</i> )-4-Hydroxymellein (60)                                                                        | Antibacterial                        | > 128 µg mL <sup>-1</sup><br>> 128 µg mL <sup>-1</sup>                                                                                                                                                                                                                                                                                | <i>S. aureus</i> ATCC 25922 (MIC)<br><i>S. aureus</i> MRSA (MIC)                                                                                                                                                                                                                                                                                                                                                                                                                                                                                                                                                                                                        | 19 |
| (-)-(3 <i>R</i> )-5-Hydroxymellein (61)                                                                                    | Antibacterial                        | > 128 µg mL <sup>-1</sup><br>> 128 µg mL <sup>-1</sup>                                                                                                                                                                                                                                                                                | <i>S. aureus</i> ATCC 25922 (MIC)<br><i>S. aureus</i> MRSA (MIC)                                                                                                                                                                                                                                                                                                                                                                                                                                                                                                                                                                                                        | 19 |
| (-)-Jasmonic acid (65)                                                                                                     | Phytotoxic                           | 5 µg                                                                                                                                                                                                                                                                                                                                  | Leaves of <i>Rosa</i> species                                                                                                                                                                                                                                                                                                                                                                                                                                                                                                                                                                                                                                           | 22 |
|                                                                                                                            | Phytotoxic                           | 1 mg mL <sup>-1</sup>                                                                                                                                                                                                                                                                                                                 | Leaves of <i>S. lycopersicum</i> (4.7 mm)                                                                                                                                                                                                                                                                                                                                                                                                                                                                                                                                                                                                                               | 6  |
|                                                                                                                            | Cytotoxic                            | 0.5 mg mL <sup>-1</sup><br>1 mg mL <sup>-1</sup>                                                                                                                                                                                                                                                                                      | Vero (cell viability: 55%)<br>3T3 (cell viability: 50%)                                                                                                                                                                                                                                                                                                                                                                                                                                                                                                                                                                                                                 |    |
|                                                                                                                            | Phytotoxic                           | 1 mg mL <sup>-1</sup>                                                                                                                                                                                                                                                                                                                 | Leaves of <i>V. vinifera</i> cv. <i>Inzolia</i> (5.9 mm <sup>2</sup> )                                                                                                                                                                                                                                                                                                                                                                                                                                                                                                                                                                                                  | 23 |
|                                                                                                                            | Phytotoxic                           | 1 mg mL <sup>-1</sup>                                                                                                                                                                                                                                                                                                                 | Leaves of <i>Q. suber</i> (11.96 mm <sup>2</sup> )<br>Leaves of <i>V. vinifera</i> cv. <i>Cannonau</i> (7.04 mm <sup>2</sup> )                                                                                                                                                                                                                                                                                                                                                                                                                                                                                                                                          | 24 |
|                                                                                                                            | Phytotoxic                           | 2500-156.25 µg mL <sup>-1</sup>                                                                                                                                                                                                                                                                                                       | Leaves of <i>B. graminis</i> (Disease severity: ~85%)                                                                                                                                                                                                                                                                                                                                                                                                                                                                                                                                                                                                                   | 17 |
|                                                                                                                            | Potato micro-tuber-inducing activity | 10 <sup>-6</sup> M                                                                                                                                                                                                                                                                                                                    | <i>S. tuberosum</i>                                                                                                                                                                                                                                                                                                                                                                                                                                                                                                                                                                                                                                                     | 1  |
| (-)-Botryodiplodin (89)                                                                                                    | Antimicrobial                        | 20 µg mL <sup>-1</sup>                                                                                                                                                                                                                                                                                                                | <i>E. coli</i> DRL K30                                                                                                                                                                                                                                                                                                                                                                                                                                                                                                                                                                                                                                                  | 25 |
|                                                                                                                            |                                      | 20 µg mL <sup>-1</sup>                                                                                                                                                                                                                                                                                                                | <i>P. vulgaris</i> B-26-2                                                                                                                                                                                                                                                                                                                                                                                                                                                                                                                                                                                                                                               |    |
|                                                                                                                            |                                      | 20 µg mL <sup>-1</sup>                                                                                                                                                                                                                                                                                                                | <i>S. typhosa</i> NCTC 3111                                                                                                                                                                                                                                                                                                                                                                                                                                                                                                                                                                                                                                             |    |
|                                                                                                                            |                                      | 20 µg mL <sup>-1</sup>                                                                                                                                                                                                                                                                                                                | <i>S. typhosa</i> NCTC 3112                                                                                                                                                                                                                                                                                                                                                                                                                                                                                                                                                                                                                                             |    |
|                                                                                                                            |                                      | 50 µg mL <sup>-1</sup>                                                                                                                                                                                                                                                                                                                | <i>S. enteritidis</i> NCTC 125                                                                                                                                                                                                                                                                                                                                                                                                                                                                                                                                                                                                                                          |    |
|                                                                                                                            |                                      | 20 µg mL <sup>-1</sup>                                                                                                                                                                                                                                                                                                                | <i>S. paratyphi</i> A NCTC 2756                                                                                                                                                                                                                                                                                                                                                                                                                                                                                                                                                                                                                                         |    |
|                                                                                                                            |                                      | 50 µg mL <sup>-1</sup>                                                                                                                                                                                                                                                                                                                | <i>S. paratyphi</i> B NCTC14                                                                                                                                                                                                                                                                                                                                                                                                                                                                                                                                                                                                                                            |    |
|                                                                                                                            |                                      | 20 µg mL <sup>-1</sup>                                                                                                                                                                                                                                                                                                                | <i>S. dysenteriae</i> NCTC8217                                                                                                                                                                                                                                                                                                                                                                                                                                                                                                                                                                                                                                          |    |
|                                                                                                                            |                                      | 100 µg mL <sup>-1</sup>                                                                                                                                                                                                                                                                                                               | <i>S. flexneri</i> NCTC 3                                                                                                                                                                                                                                                                                                                                                                                                                                                                                                                                                                                                                                               |    |
|                                                                                                                            |                                      | 50 µg mL <sup>-1</sup>                                                                                                                                                                                                                                                                                                                | <i>K. pneumoniae</i> NCTC 204                                                                                                                                                                                                                                                                                                                                                                                                                                                                                                                                                                                                                                           |    |
|                                                                                                                            |                                      | 20 µg mL <sup>-1</sup>                                                                                                                                                                                                                                                                                                                | <i>V. comma</i> B-53-2                                                                                                                                                                                                                                                                                                                                                                                                                                                                                                                                                                                                                                                  |    |
|                                                                                                                            |                                      | 100 µg mL <sup>-1</sup>                                                                                                                                                                                                                                                                                                               | <i>V. comma</i> B-53-1                                                                                                                                                                                                                                                                                                                                                                                                                                                                                                                                                                                                                                                  |    |
|                                                                                                                            |                                      | 50 µg mL <sup>-1</sup>                                                                                                                                                                                                                                                                                                                | <i>P. aeruginosa</i> B-27-2                                                                                                                                                                                                                                                                                                                                                                                                                                                                                                                                                                                                                                             |    |
|                                                                                                                            |                                      | 50 µg mL <sup>-1</sup>                                                                                                                                                                                                                                                                                                                | <i>S. aureus</i> NCTC 6571                                                                                                                                                                                                                                                                                                                                                                                                                                                                                                                                                                                                                                              |    |
|                                                                                                                            |                                      | 50 µg mL <sup>-1</sup>                                                                                                                                                                                                                                                                                                                | <i>S. albus</i> NCTC 3094                                                                                                                                                                                                                                                                                                                                                                                                                                                                                                                                                                                                                                               |    |
|                                                                                                                            |                                      | 50 µg mL <sup>-1</sup>                                                                                                                                                                                                                                                                                                                | <i>M. flavus</i> NCTC 7743                                                                                                                                                                                                                                                                                                                                                                                                                                                                                                                                                                                                                                              |    |
|                                                                                                                            |                                      | 100 µg mL <sup>-1</sup>                                                                                                                                                                                                                                                                                                               | <i>S. faecalis</i> NCTC 370                                                                                                                                                                                                                                                                                                                                                                                                                                                                                                                                                                                                                                             |    |
| 50 µg mL <sup>-1</sup>                                                                                                     | <i>B. subtilis</i> DRL K-6           |                                                                                                                                                                                                                                                                                                                                       |                                                                                                                                                                                                                                                                                                                                                                                                                                                                                                                                                                                                                                                                         |    |
| 50 µg mL <sup>-1</sup>                                                                                                     | <i>B. bronchiseptica</i> NCTC 8344   |                                                                                                                                                                                                                                                                                                                                       |                                                                                                                                                                                                                                                                                                                                                                                                                                                                                                                                                                                                                                                                         |    |
| 50 µg mL <sup>-1</sup>                                                                                                     | <i>S. lutea</i> DRL K-42             |                                                                                                                                                                                                                                                                                                                                       |                                                                                                                                                                                                                                                                                                                                                                                                                                                                                                                                                                                                                                                                         |    |
| 20 µg mL <sup>-1</sup>                                                                                                     | <i>S. cerevisiae</i> DRL 845         |                                                                                                                                                                                                                                                                                                                                       |                                                                                                                                                                                                                                                                                                                                                                                                                                                                                                                                                                                                                                                                         |    |
| 100 µg mL <sup>-1</sup>                                                                                                    | <i>C. albicans</i> DRL 969           |                                                                                                                                                                                                                                                                                                                                       |                                                                                                                                                                                                                                                                                                                                                                                                                                                                                                                                                                                                                                                                         |    |
|                                                                                                                            | Cytotoxic                            | 1 mg mL <sup>-1</sup><br>1 mg mL <sup>-1</sup>                                                                                                                                                                                                                                                                                        | Vero (cell viability: 50%)<br>3T3 (cell viability: 8%)                                                                                                                                                                                                                                                                                                                                                                                                                                                                                                                                                                                                                  | 26 |
| 3- <i>epi</i> -Botryodiplodin (90)                                                                                         | Phytotoxic                           | 1 mg mL <sup>-1</sup>                                                                                                                                                                                                                                                                                                                 | Leaves of <i>S. lycopersicum</i> (0.73 mm)                                                                                                                                                                                                                                                                                                                                                                                                                                                                                                                                                                                                                              | 26 |
|                                                                                                                            | Cytotoxic                            | 1 mg mL <sup>-1</sup><br>1 mg mL <sup>-1</sup>                                                                                                                                                                                                                                                                                        | Vero (cell viability: 0%)<br>3T3 (cell viability: 0%)                                                                                                                                                                                                                                                                                                                                                                                                                                                                                                                                                                                                                   |    |
| (3 <i>R</i> ,4 <i>S</i> )-4-Acetyl-3-methylhydrofuran-2(3 <i>H</i> )-one (91)                                              | Phytotoxic                           | 1 mg mL <sup>-1</sup>                                                                                                                                                                                                                                                                                                                 | Leaves of <i>S. lycopersicum</i> (0.50 mm)                                                                                                                                                                                                                                                                                                                                                                                                                                                                                                                                                                                                                              | 26 |
|                                                                                                                            | Cytotoxic                            | 0.5 mg mL <sup>-1</sup><br>1 mg mL <sup>-1</sup>                                                                                                                                                                                                                                                                                      | Vero (cell viability: 10%)<br>3T3 (cell viability: 5%)                                                                                                                                                                                                                                                                                                                                                                                                                                                                                                                                                                                                                  |    |
| (3 <i>S</i> ,4 <i>S</i> )-4-Acetyl-3-methylhydrofuran-2(3 <i>H</i> )-one (92)                                              | Cytotoxic                            | 1 mg mL <sup>-1</sup><br>1 mg mL <sup>-1</sup>                                                                                                                                                                                                                                                                                        | Vero (cell viability: 10%)<br>3T3 (cell viability: 0%)                                                                                                                                                                                                                                                                                                                                                                                                                                                                                                                                                                                                                  | 26 |
| Nigrosphaerilactone (3 <i>S</i> ,4 <i>R</i> ,5 <i>R</i> )-4-(Hydroxymethyl)-3,5-dimethylhydrofuran-2(3 <i>H</i> )-one (94) | Cytotoxic                            | 0.5 mg mL <sup>-1</sup><br>0.5 mg mL <sup>-1</sup>                                                                                                                                                                                                                                                                                    | Vero (cell viability: 60%)<br>3T3 (cell viability: 50%)                                                                                                                                                                                                                                                                                                                                                                                                                                                                                                                                                                                                                 | 6  |
|                                                                                                                            | Cytotoxic                            | 0.5 mg mL <sup>-1</sup><br>0.5 mg mL <sup>-1</sup>                                                                                                                                                                                                                                                                                    | Vero (cell viability: 65%)<br>3T3 (cell viability: 50%)                                                                                                                                                                                                                                                                                                                                                                                                                                                                                                                                                                                                                 | 26 |

|                                                                                       |                      |                                                                                                          |                                                                                                                                               |    |
|---------------------------------------------------------------------------------------|----------------------|----------------------------------------------------------------------------------------------------------|-----------------------------------------------------------------------------------------------------------------------------------------------|----|
|                                                                                       | Phytotoxic           | 1 mg mL <sup>-1</sup>                                                                                    | <i>V. vinifera</i> cv. <i>Inzolia</i> (2.25 mm <sup>2</sup> )                                                                                 | 23 |
|                                                                                       | Enzymatic inhibitory | 0.38 µg mL <sup>-1</sup>                                                                                 | Xanthine oxidase (IC <sub>50</sub> )                                                                                                          | 27 |
| Botryosphaerilactone A (95)                                                           | Cytotoxic            | 1 mg mL <sup>-1</sup><br>0.5 mg mL <sup>-1</sup>                                                         | Vero (cell viability: 0%)<br>3T3 (cell viability: 60%)                                                                                        | 6  |
| Lasiolactol A (102)                                                                   | Cytotoxic            | 1 mg mL <sup>-1</sup><br>1 mg mL <sup>-1</sup>                                                           | Vero (cell viability: 70%)<br>3T3 (cell viability: 50%)                                                                                       | 26 |
|                                                                                       | Phytotoxic           | 1 mg mL <sup>-1</sup>                                                                                    | <i>V. vinifera</i> cv. <i>Inzolia</i> (0.84 mm <sup>2</sup> )                                                                                 | 23 |
| Lasiolactol B (103)                                                                   | Cytotoxic            | 1 mg mL <sup>-1</sup><br>1 mg mL <sup>-1</sup>                                                           | Vero (cell viability: 70%)<br>3T3 (cell viability: 50%)                                                                                       | 26 |
|                                                                                       | Phytotoxic           | 1 mg mL <sup>-1</sup>                                                                                    | <i>V. vinifera</i> cv. <i>Inzolia</i> (0.84 mm <sup>2</sup> )                                                                                 | 23 |
| (3 <i>S</i> ,4 <i>R</i> )-3-Carboxy-2-methylene-heptan-4-olide (104)                  | Phytotoxic           | 18 µg                                                                                                    | <i>M. acuminata</i>                                                                                                                           | 28 |
| Lasdiplactone (108)                                                                   | Enzymatic inhibitory | 2.81 µg mL <sup>-1</sup>                                                                                 | Xanthine oxidase (IC <sub>50</sub> )                                                                                                          | 27 |
| (4 <i>R</i> *,6 <i>R</i> *)-4-Hydroxy-6- <i>N</i> -propyl-1-oxacyclohexan-2-one (111) | Cytotoxic            | 480.2 µg/mL<br>15.9 µg/mL                                                                                | MCF-7 (IC <sub>50</sub> )<br>CV-1 (IC <sub>50</sub> )                                                                                         | 18 |
| Lasiodione A (116)                                                                    | Cytotoxic            | 18.3 µM<br>45.7 µM                                                                                       | HepG-2 (IC <sub>50</sub> )<br>MCF-7 (IC <sub>50</sub> )                                                                                       | 29 |
| 3-Methyl-3,4-dihydro-1 <i>H</i> -isochromene-1,8(7 <i>H</i> )-dione (117)             | Antibacterial        | 128 µg mL <sup>-1</sup><br>128 µg mL <sup>-1</sup><br>128 µg mL <sup>-1</sup><br>128 µg mL <sup>-1</sup> | <i>E. coli</i> (MIC)<br><i>S. aureus</i> (MIC)<br><i>S. thypi</i> (MIC)<br><i>B. subtilis</i> (MIC)                                           | 30 |
| 3-Hydroxy-4(hydroxy(4-hydroxyphenyl)methyl)- $\gamma$ -butyrolactone (118)            | Antibacterial        | 32 µg mL <sup>-1</sup><br>64 µg mL <sup>-1</sup><br>32 µg mL <sup>-1</sup><br>32 µg mL <sup>-1</sup>     | <i>E. coli</i> (MIC)<br><i>S. aureus</i> (MIC)<br><i>S. thypi</i> (MIC)<br><i>B. subtilis</i> (MIC)                                           | 30 |
|                                                                                       | Antioxidant          | 20.9 µg mL <sup>-1</sup>                                                                                 | DPPH (IC <sub>50</sub> )                                                                                                                      |    |
| Tyrosol (129)                                                                         | Cytotoxic            | 59.64 µg mL <sup>-1</sup><br>155.2 µg mL <sup>-1</sup>                                                   | MCF-7 (IC <sub>50</sub> )<br>CV-1 (IC <sub>50</sub> )                                                                                         | 18 |
|                                                                                       | Phytotoxic           | 100 mg mL <sup>-1</sup>                                                                                  | <i>D. aegyptium</i><br>(Lesion severity: 14.8%)                                                                                               | 31 |
| 2-Phenylethanol (130)                                                                 | Cytotoxic            | 996.4 µg mL <sup>-1</sup><br>1000 µg mL <sup>-1</sup>                                                    | MCF-7 (IC <sub>50</sub> )<br>CV-1 (IC <sub>50</sub> )                                                                                         | 18 |
| 4-Hydroxyphenyl acetic acid (133)                                                     | Phytotoxic           | 100 mg mL <sup>-1</sup>                                                                                  | <i>D. aegyptium</i><br>(Lesion severity: 7.6%)                                                                                                | 31 |
| Chloropreussomerin A (150)                                                            | Cytotoxic            | 8.5 µM<br>13 µM<br>19 µM<br>5.9 µM<br>4.8 µM                                                             | A549 (IC <sub>50</sub> )<br>HepG2 (IC <sub>50</sub> )<br>HeLa (IC <sub>50</sub> )<br>MCF-7 (IC <sub>50</sub> )<br>HEK293T (IC <sub>50</sub> ) | 32 |
|                                                                                       | Antibacterial        | 6.2 µg mL <sup>-1</sup><br>50 µg mL <sup>-1</sup>                                                        | <i>S. aureus</i> (MIC)<br><i>B. subtilis</i> (MIC)                                                                                            |    |
| Chloropreussomerin B (151)                                                            | Cytotoxic            | 8.9 µM<br>7.7 µM<br>27 µM<br>6.2 µM<br>11 µM                                                             | A549 (IC <sub>50</sub> )<br>HepG2 (IC <sub>50</sub> )<br>HeLa (IC <sub>50</sub> )<br>MCF-7 (IC <sub>50</sub> )<br>HEK293T (IC <sub>50</sub> ) | 32 |
|                                                                                       | Antibacterial        | 3.2 µg mL <sup>-1</sup><br>25 µg mL <sup>-1</sup>                                                        | <i>S. aureus</i> (MIC)<br><i>B. subtilis</i> (MIC)                                                                                            |    |
| Preussomerin A (152)                                                                  | Cytotoxic            | 40.2 µM<br>71 µM                                                                                         | A549 (IC <sub>50</sub> )<br>MCF-7 (IC <sub>50</sub> )                                                                                         | 32 |
|                                                                                       | Antibacterial        | 6.2 µg mL <sup>-1</sup><br>13 µg mL <sup>-1</sup>                                                        | <i>S. aureus</i> (MIC)<br><i>B. subtilis</i> (MIC)                                                                                            |    |
| Preussomerin B (153)                                                                  | Immunomodulatory     | 5.9 µM                                                                                                   | NO production (IC <sub>50</sub> )                                                                                                             | 33 |
| Preussomerin D (155)                                                                  | Cytotoxic            | 6.6 µM<br>38 µM<br>21 µM<br>9.8 µM<br>24 µM                                                              | A549 (IC <sub>50</sub> )<br>HepG2 (IC <sub>50</sub> )<br>HeLa (IC <sub>50</sub> )<br>MCF-7 (IC <sub>50</sub> )<br>HEK293T (IC <sub>50</sub> ) | 32 |
| Preussomerin F (156)                                                                  | Cytotoxic            | 7.7 µM<br>3.6 µM<br>18 µM<br>3.1 µM<br>6.9 µM                                                            | A549 (IC <sub>50</sub> )<br>HepG2 (IC <sub>50</sub> )<br>HeLa (IC <sub>50</sub> )<br>MCF-7 (IC <sub>50</sub> )<br>HEK293T (IC <sub>50</sub> ) | 32 |
|                                                                                       | Antibacterial        | 13 µg mL <sup>-1</sup><br>25 µg mL <sup>-1</sup>                                                         | <i>S. aureus</i> (MIC)<br><i>B. subtilis</i> (MIC)                                                                                            |    |
| Preussomerin G (157)                                                                  | Cytotoxic            | 6.2 µM                                                                                                   | A549 (IC <sub>50</sub> )                                                                                                                      | 32 |

|                                       |                                      |                                                                                                                                                                                        |                                                                                                                                                                                                      |                                           |
|---------------------------------------|--------------------------------------|----------------------------------------------------------------------------------------------------------------------------------------------------------------------------------------|------------------------------------------------------------------------------------------------------------------------------------------------------------------------------------------------------|-------------------------------------------|
|                                       |                                      | 8.5 $\mu\text{M}$<br>14 $\mu\text{M}$<br>4.2 $\mu\text{M}$<br>17 $\mu\text{M}$                                                                                                         | HepG2 (IC <sub>50</sub> )<br>HeLa (IC <sub>50</sub> )<br>MCF-7 (IC <sub>50</sub> )<br>HEK293T (IC <sub>50</sub> )                                                                                    |                                           |
|                                       | Antibacterial                        | 13 $\mu\text{g mL}^{-1}$<br>50 $\mu\text{g mL}^{-1}$                                                                                                                                   | <i>S. aureus</i> (MIC)<br><i>B. subtilis</i> (MIC)                                                                                                                                                   |                                           |
| Preussomerin H (158)                  | Cytotoxic                            | 9.4 $\mu\text{M}$<br>4.4 $\mu\text{M}$<br>19 $\mu\text{M}$<br>2.6 $\mu\text{M}$<br>12 $\mu\text{M}$                                                                                    | A549 (IC <sub>50</sub> )<br>HepG2 (IC <sub>50</sub> )<br>HeLa (IC <sub>50</sub> )<br>MCF-7 (IC <sub>50</sub> )<br>HEK293T (IC <sub>50</sub> )                                                        | 32                                        |
|                                       | Antibacterial                        | 1.6 $\mu\text{g mL}^{-1}$<br>13 $\mu\text{g mL}^{-1}$                                                                                                                                  | <i>S. aureus</i> (MIC)<br><i>B. subtilis</i> (MIC)                                                                                                                                                   |                                           |
| Preussomerin K (159)                  | Cytotoxic                            | 5.4 $\mu\text{M}$<br>3.8 $\mu\text{M}$<br>15 $\mu\text{M}$<br>2.5 $\mu\text{M}$<br>9.4 $\mu\text{M}$                                                                                   | A549 (IC <sub>50</sub> )<br>HepG2 (IC <sub>50</sub> )<br>HeLa (IC <sub>50</sub> )<br>MCF-7 (IC <sub>50</sub> )<br>HEK293T (IC <sub>50</sub> )                                                        | 32                                        |
|                                       | Antibacterial                        | 50 $\mu\text{g mL}^{-1}$<br>25 $\mu\text{g mL}^{-1}$                                                                                                                                   | <i>S. aureus</i> (MIC)<br><i>B. subtilis</i> (MIC)                                                                                                                                                   |                                           |
| Preussomerin M (160)                  | Cytotoxic                            | 36.1 $\mu\text{M}$<br>83 $\mu\text{M}$<br>13 $\mu\text{M}$<br>83 $\mu\text{M}$                                                                                                         | A549 (IC <sub>50</sub> )<br>HepG2 (IC <sub>50</sub> )<br>MCF-7 (IC <sub>50</sub> )<br>HEK293T (IC <sub>50</sub> )                                                                                    | 32                                        |
| Ymf 1029 E (161)                      | Cytotoxic                            | 76.2 $\mu\text{M}$<br>86 $\mu\text{M}$                                                                                                                                                 | A549 (IC <sub>50</sub> )<br>HEK293T (IC <sub>50</sub> )                                                                                                                                              | 32                                        |
| Preussomerin SA1 (164)                | Immunomodulatory                     | 12.8 $\mu\text{M}$                                                                                                                                                                     | NO production (IC <sub>50</sub> )                                                                                                                                                                    | 33                                        |
| Palmarumycin LP1 (168)                | Cytotoxic                            | 2.39 $\mu\text{M}$                                                                                                                                                                     | HL-60 (IC <sub>50</sub> )                                                                                                                                                                            | 34                                        |
| Sch 50676 (170)                       | Cytotoxic                            | 1.41 $\mu\text{M}$                                                                                                                                                                     | HL-60 (IC <sub>50</sub> )                                                                                                                                                                            | 34                                        |
| Cladospirone B (171)                  | Antitrypanosomal                     | 17.8 $\mu\text{M}$                                                                                                                                                                     | <i>T. brucei brucei</i> (MIC)                                                                                                                                                                        | 35                                        |
|                                       | Cytotoxic                            | 10.91 $\mu\text{M}$                                                                                                                                                                    | HL-60 (IC <sub>50</sub> )                                                                                                                                                                            | 34                                        |
| Lasiodiplodiapyrone A (172)           | Immunomodulatory                     | 4.8 $\mu\text{M}$                                                                                                                                                                      | NO production (IC <sub>50</sub> )                                                                                                                                                                    | 33                                        |
| Lasiodiplodiapyrone B (173)           | Immunomodulatory                     | 8.5 $\mu\text{M}$                                                                                                                                                                      | NO production (IC <sub>50</sub> )                                                                                                                                                                    | 33                                        |
| (R)-Lasiodiplodin (177)               | Antifungal                           | 15.50 $\mu\text{g mL}^{-1}$<br>27.45 $\mu\text{g mL}^{-1}$<br>17.55 $\mu\text{g mL}^{-1}$<br>52.30 $\mu\text{g mL}^{-1}$<br>40.35 $\mu\text{g mL}^{-1}$<br>15.90 $\mu\text{g mL}^{-1}$ | <i>E. turcicum</i> (MIC)<br><i>C. paradoxa</i> (MIC)<br><i>P. theae</i> (MIC)<br><i>A. oleracea</i> (MIC)<br><i>A. citri</i> (MIC)<br><i>C. capsica</i> (MIC)                                        | 36                                        |
|                                       |                                      | Phytotoxic                                                                                                                                                                             | 1 mg mL <sup>-1</sup>                                                                                                                                                                                | Leaves of <i>S. lycopersicum</i> (3.3 mm) |
|                                       | Cytotoxic                            | 1 mg mL <sup>-1</sup><br>1 mg mL <sup>-1</sup>                                                                                                                                         | Vero (cell viability: 0%)<br>3T3 (cell viability: 0%)                                                                                                                                                |                                           |
|                                       | Antimicrobial                        | 25 $\mu\text{g mL}^{-1}$<br>50 $\mu\text{g mL}^{-1}$<br>100 $\mu\text{g mL}^{-1}$                                                                                                      | <i>S. aureus</i> ATCC27154 (MIC)<br><i>B. subtilis</i> ATCC 6633 (MIC)<br><i>F. oxysporum</i> f. sp. cubense (MIC)                                                                                   | 37                                        |
| (S)-Lasiodiplodin (178)               | Antibacterial                        | 64 $\mu\text{g mL}^{-1}$<br>128 $\mu\text{g mL}^{-1}$                                                                                                                                  | <i>S. aureus</i> ATCC 25922 (MIC)<br><i>S. aureus</i> MRSA (MIC)                                                                                                                                     | 19                                        |
| (3R,4S)-4-Hydroxy-lasiodiplodin (179) | Potato micro-tuber-inducing activity | 10 <sup>-4</sup> M                                                                                                                                                                     | <i>S. tuberosum</i>                                                                                                                                                                                  | 38                                        |
| (3R,5R)-5-Hydroxy-lasiodiplodin (180) | Potato micro-tuber-inducing activity | 10 <sup>-4</sup> M                                                                                                                                                                     | <i>S. tuberosum</i>                                                                                                                                                                                  | 38                                        |
|                                       | Potato micro-tuber-inducing activity | 10 <sup>-3</sup> M                                                                                                                                                                     | <i>S. tuberosum</i>                                                                                                                                                                                  | 39                                        |
| (3R,5S)-5-Hydroxy-lasiodiplodin (181) | Potato micro-tuber-inducing activity | 10 <sup>-3</sup> M                                                                                                                                                                     | <i>S. tuberosum</i>                                                                                                                                                                                  | 39                                        |
| (3R,6S)-6-Hydroxy-lasiodiplodin (182) | Potato micro-tuber-inducing activity | 10 <sup>-4</sup> M                                                                                                                                                                     | <i>S. tuberosum</i>                                                                                                                                                                                  | 40                                        |
| Botryosphaeriodiplodin (184)          | Phytotoxic                           | 1 mg mL <sup>-1</sup>                                                                                                                                                                  | <i>V. vinifera</i> cv. <i>Inzolia</i> (0.8 mm <sup>2</sup> )                                                                                                                                         | 23                                        |
|                                       | Antibacterial                        |                                                                                                                                                                                        | <i>S. aureus</i> (inhibition: 29 mm)                                                                                                                                                                 | 41                                        |
| (3R)-De-O-methyl-lasiodiplodin (185)  | Cytotoxic                            | ~10 $\mu\text{M}$<br>~10 $\mu\text{M}$<br>~30 $\mu\text{M}$                                                                                                                            | MMQ (IC <sub>50</sub> )<br>GH3 (IC <sub>50</sub> )<br>RPC (IC <sub>50</sub> )                                                                                                                        | 42                                        |
|                                       | Antimicrobial                        | 6.5 $\mu\text{g mL}^{-1}$<br>12.5 $\mu\text{g mL}^{-1}$<br>12.5 $\mu\text{g mL}^{-1}$<br>100 $\mu\text{g mL}^{-1}$<br>50 $\mu\text{g mL}^{-1}$                                         | <i>S. aureus</i> ATCC 27154 (MIC)<br><i>B. subtilis</i> ATCC 6633 (MIC)<br><i>S. enteritidis</i> ATCC 13076 (MIC)<br><i>C. albicans</i> ATCC 10231 (MIC)<br><i>F. oxysporum</i> f. sp. cubense (MIC) | 37                                        |

|                                                                                                                                         |                             |                                                             |                                                                                 |    |
|-----------------------------------------------------------------------------------------------------------------------------------------|-----------------------------|-------------------------------------------------------------|---------------------------------------------------------------------------------|----|
|                                                                                                                                         | Antitrypanosomal            | 22.5 $\mu\text{M}$                                          | <i>T. brucei brucei</i> (MIC)                                                   | 35 |
|                                                                                                                                         | Antiproliferative           | 10 $\mu\text{g mL}^{-1}$                                    | L5178Y (weak activity)                                                          | 43 |
|                                                                                                                                         | Antibacterial               | 25 $\mu\text{g mL}^{-1}$                                    | <i>S. aureus</i> ATCC 29213 (MIC)                                               |    |
|                                                                                                                                         |                             | 25 $\mu\text{g mL}^{-1}$                                    | <i>S. aureus</i> ATCC 700699 (MIC)                                              |    |
|                                                                                                                                         |                             | 25 $\mu\text{g mL}^{-1}$                                    | <i>E. faecium</i> ATCC 35667 (MIC)                                              |    |
| (3 <i>R</i> ,5 <i>R</i> )-5-Hydroxy-de- <i>O</i> -methylsiasiodiplodin ( <b>187</b> )                                                   | Antimicrobial               | 100 $\mu\text{g mL}^{-1}$                                   | <i>S. aureus</i> ATCC 27154 (MIC)                                               | 37 |
| (6 <i>R</i> )-6-Hydroxy-de- <i>O</i> -methylsiasiodiplodin ( <b>188</b> )                                                               | Potato micro-tuber-inducing | 10 <sup>-4</sup> M                                          | <i>S. tuberosum</i>                                                             | 38 |
| (3 <i>S</i> )-7-Oxo-de- <i>O</i> -methylsiasiodiplodin ( <b>191</b> )                                                                   | Phytotoxic                  | 25-100 $\mu\text{g mL}^{-1}$                                | <i>D. ciliaris</i> (growth inhibition)<br><i>L. sativa</i> (growth inhibition)  | 44 |
| (3 <i>S</i> ,7 <i>R</i> )-9-Etheno-7-hydroxy-13- <i>O</i> -methyl-de- <i>O</i> -methylsiasiodiplodin ( <b>193</b> )                     | Phytotoxic                  | 25-100 $\mu\text{g mL}^{-1}$                                | <i>D. ciliaris</i> (growth inhibition)<br><i>L. sativa</i> (growth inhibition)  | 44 |
| Lasiodiplactone A ( <b>196</b> )                                                                                                        | Immunomodulatory            | 23.5 $\mu\text{M}$                                          | NO production (IC <sub>50</sub> )                                               | 45 |
|                                                                                                                                         | Enzymatic inhibitory        | 29.4 $\mu\text{M}$                                          | $\alpha$ -Glucosidase (IC <sub>50</sub> )                                       |    |
| <i>(R)</i> -Zearalenone ( <b>199</b> )                                                                                                  | Cytotoxic                   | ~20 $\mu\text{M}$                                           | MMQ (IC <sub>50</sub> )                                                         | 42 |
|                                                                                                                                         |                             | ~10 $\mu\text{M}$                                           | GH3 (IC <sub>50</sub> )                                                         |    |
|                                                                                                                                         |                             | ~30 $\mu\text{M}$                                           | RPC (IC <sub>50</sub> )                                                         |    |
| 2,4-Dihydroxy-6-nonylbenzoate ( <b>200</b> )                                                                                            | Cytotoxic                   | 5.29 $\mu\text{M}$                                          | MMQ (IC <sub>50</sub> )                                                         | 42 |
|                                                                                                                                         |                             | 13.05 $\mu\text{M}$                                         | GH3 (IC <sub>50</sub> )                                                         |    |
|                                                                                                                                         |                             | ~20 $\mu\text{M}$                                           | RPC (IC <sub>50</sub> )                                                         |    |
| Ethyl (5 <i>S</i> )-2,4-dihydroxy-6-(8-hydroxynonyl)benzoate ( <b>201</b> )                                                             | Phytotoxic                  | 25-100 $\mu\text{g mL}^{-1}$                                | <i>D. ciliaris</i> (growth inhibition)<br><i>L. sativa</i> (growth inhibition)  | 44 |
|                                                                                                                                         | Phytotoxic                  | 25-100 $\mu\text{g mL}^{-1}$                                | <i>D. ciliaris</i> (growth inhibition)<br><i>L. sativa</i> (growth stimulation) | 46 |
|                                                                                                                                         | Cytotoxic                   | 10.13 $\mu\text{M}$                                         | MDA-MB-435 (IC <sub>50</sub> )                                                  | 47 |
|                                                                                                                                         |                             | 12.50 $\mu\text{M}$                                         | HepG2 (IC <sub>50</sub> )                                                       |    |
| 11.92 $\mu\text{M}$                                                                                                                     |                             | HCT-116 (IC <sub>50</sub> )                                 |                                                                                 |    |
|                                                                                                                                         |                             | 13.31 $\mu\text{M}$                                         | A549 (IC <sub>50</sub> )                                                        |    |
|                                                                                                                                         |                             | 39.74 $\mu\text{M}$                                         | THP1 (IC <sub>50</sub> )                                                        |    |
| Ethyl 2,4-dihydroxy-6-(8-hydroxyheptyl)benzoate ( <b>202</b> )                                                                          | Phytotoxic                  | 25-100 $\mu\text{g mL}^{-1}$                                | <i>D. ciliaris</i> (growth inhibition)<br><i>L. sativa</i> (growth inhibition)  | 44 |
|                                                                                                                                         | Phytotoxic                  | 25-100 $\mu\text{g mL}^{-1}$                                | <i>D. ciliaris</i> (growth inhibition)<br><i>L. sativa</i> (growth stimulation) | 46 |
| Ethyl 2,4-dihydroxy-6-(4-methoxycarbonylbutyl)benzoate ( <b>203</b> )                                                                   | Phytotoxic                  | 25-100 $\mu\text{g mL}^{-1}$                                | <i>D. ciliaris</i> (growth inhibition)<br><i>L. sativa</i> (growth stimulation) | 46 |
| Isobutyl ( <i>S</i> )-2,4-dihydroxy-6-(8-hydroxynonyl)benzoate ( <b>204</b> )                                                           | Phytotoxic                  | 25-100 $\mu\text{g mL}^{-1}$                                | <i>D. ciliaris</i> (growth inhibition)<br><i>L. sativa</i> (growth stimulation) | 46 |
| Ethyl 2,4-dihydroxy-6-(8-oxononyl)benzoate ( <b>205</b> )                                                                               | Phytotoxic                  | 25-100 $\mu\text{g mL}^{-1}$                                | <i>D. ciliaris</i> (growth inhibition)<br><i>L. sativa</i> (growth inhibition)  | 44 |
|                                                                                                                                         | Phytotoxic                  | 25-100 $\mu\text{g mL}^{-1}$                                | <i>D. ciliaris</i> (growth inhibition)<br><i>L. sativa</i> (growth stimulation) | 46 |
|                                                                                                                                         | Cytotoxic                   | ~20 $\mu\text{M}$<br>~30 $\mu\text{M}$<br>~30 $\mu\text{M}$ | MMQ (IC <sub>50</sub> )<br>GH3 (IC <sub>50</sub> )<br>RPC (IC <sub>50</sub> )   | 42 |
| (3 <i>S</i> ,7 <i>R</i> )-7-Hydroxy-13- <i>O</i> -methyl-de- <i>O</i> -methylsiasiodiplodin ( <b>206</b> )                              | Phytotoxic                  | 25-100 $\mu\text{g mL}^{-1}$                                | <i>D. ciliaris</i> (growth inhibition)<br><i>L. sativa</i> (growth inhibition)  | 44 |
| (15 <i>S</i> )-De- <i>O</i> -methylsiasiodiplodin ( <b>207</b> )                                                                        | Phytotoxic                  | 25-100 $\mu\text{g mL}^{-1}$                                | <i>D. ciliaris</i> (growth inhibition)<br><i>L. sativa</i> (growth stimulation) | 46 |
|                                                                                                                                         | Antifungal                  | 8 $\mu\text{g mL}^{-1}$                                     | <i>S. rolfisii</i> (MIC)                                                        | 48 |
| (14 <i>S</i> ,15 <i>S</i> )-14-Hydroxy-de- <i>O</i> -methylsiasiodiplodin ( <b>209</b> )                                                | Phytotoxic                  | 25-100 $\mu\text{g mL}^{-1}$                                | <i>D. ciliaris</i> (growth inhibition)<br><i>L. sativa</i> (growth stimulation) | 46 |
| (13 <i>R</i> ,14 <i>S</i> ,15 <i>S</i> )-13,14-Dihydroxy-de- <i>O</i> -methylsiasiodiplodin ( <b>210</b> )                              | Phytotoxic                  | 25-100 $\mu\text{g mL}^{-1}$                                | <i>D. ciliaris</i> (growth inhibition)<br><i>L. sativa</i> (growth stimulation) | 46 |
| Ergosterol ( <b>217</b> )                                                                                                               | Cytotoxic                   | 0.34 $\mu\text{M}$                                          | HeLa (IC <sub>50</sub> )                                                        | 49 |
| Ergosterol peroxide ( <b>218</b> )                                                                                                      | Cytotoxic                   | 0.28 $\mu\text{M}$                                          | HeLa (IC <sub>50</sub> )                                                        | 49 |
| Stigmasterol ( <b>219</b> )                                                                                                             | Cytotoxic                   | 27.32 $\mu\text{M}$                                         | HeLa (IC <sub>50</sub> )                                                        | 49 |
| (22 <i>E</i> ,24 <i>R</i> )-4 $\alpha$ ,5 $\alpha$ -Epoxyergosta-9 $\alpha$ ,14 $\beta$ -dihydroxy-7,22-diene-3,6-dione ( <b>220</b> )  | Cytotoxic                   | 15.8 $\mu\text{M}$                                          | SU-DHL-2 (IC <sub>50</sub> )                                                    | 50 |
|                                                                                                                                         |                             | 17.1 $\mu\text{M}$                                          | HL-60 (IC <sub>50</sub> )                                                       |    |
|                                                                                                                                         | Neuroprotective             | 10/20/40 $\mu\text{M}$                                      | glutamate-treated SH-SY5YSH-SY5Y                                                | 50 |
| (22 <i>E</i> ,24 <i>R</i> )-4 $\alpha$ ,5 $\alpha$ -Epoxyergosta-9 $\alpha$ ,14 $\alpha$ -dihydroxy-7,22-diene-3,6-dione ( <b>221</b> ) | Neuroprotective             | 10/20/40 $\mu\text{M}$                                      | glutamate-treated SH-SY5YSH-SY5Y                                                | 50 |
| 12 $\alpha$ -Hydroxyergosta-7,22,24(28)-triene-3-one ( <b>222</b> )                                                                     | Neuroprotective             | 10/20/40 $\mu\text{M}$                                      | glutamate-treated SH-SY5YSH-SY5Y                                                | 50 |
| 3 $\beta$ ,12 $\alpha$ -Dihydroxyergosta-7,24(28)-diene ( <b>223</b> )                                                                  | Neuroprotective             | 10/20/40 $\mu\text{M}$                                      | glutamate-treated SH-SY5YSH-SY5Y                                                | 50 |
| (22 <i>E</i> ,24 <i>R</i> )-9 $\alpha$ ,14 $\beta$ -Dihydroxyergosta-                                                                   | Cytotoxic                   | 7.5 $\mu\text{M}$                                           | SU-DHL-2 (IC <sub>50</sub> )                                                    | 50 |

|                               |                           |                                                                                     |                                                                                                               |          |
|-------------------------------|---------------------------|-------------------------------------------------------------------------------------|---------------------------------------------------------------------------------------------------------------|----------|
| 4,7,22-triene-3,6-dione (224) |                           | 8.8 $\mu\text{M}$<br>18.6 $\mu\text{M}$<br>30.2 $\mu\text{M}$<br>31.4 $\mu\text{M}$ | HL-60 (IC <sub>50</sub> )<br>HepG2 (IC <sub>50</sub> )<br>RKO (IC <sub>50</sub> )<br>A549 (IC <sub>50</sub> ) |          |
|                               | Neuroprotective           | 10/20/40 $\mu\text{M}$                                                              | glutamate-treated SH-SY5YSH-SY5Y                                                                              |          |
| Colletopeptide B (234)        | Cytotoxic                 | 310 $\mu\text{g mL}^{-1}$<br>630 $\mu\text{g mL}^{-1}$                              | MCF-7 (IC <sub>50</sub> )<br>CV-1 (IC <sub>50</sub> )                                                         | 18       |
| Taxol (235)                   | Anticancer<br>Antioxidant |                                                                                     | 7, 12 dimethyl benz(a)anthracene (DMBA)-<br>induced mammary gland                                             | 51       |
|                               | Cytotoxic                 | 300 $\mu\text{g}$                                                                   | MCF-7 (IC <sub>50</sub> )                                                                                     | 52<br>53 |
| Lasiodiplin (238)             | Phytotoxic                | 100 mg/mL                                                                           | <i>D. aegyptium</i><br>(Lesion severity: 4.3%)                                                                | 31       |
| Lasiodione B (251)            | Cytotoxic                 | 2.4 $\mu\text{M}$<br>16.3 $\mu\text{M}$                                             | HepG-2 (IC <sub>50</sub> )<br>MCF-7 (IC <sub>50</sub> )                                                       | 29       |
| Lasdiploic acid (252)         | Enzymatic inhibitory      | 0.41 $\mu\text{g mL}^{-1}$                                                          | Xanthine oxidase (IC <sub>50</sub> )                                                                          | 27       |
| Uracil (265)                  | Phytotoxic                | 10 mg mL <sup>-1</sup>                                                              | <i>D. aegyptium</i><br>(Lesion severity: 5.6%)                                                                | 31       |

## References

- 1 K. Nakamori, H. Matsuura, T. Yoshihara, A. Ichihara and Y. Koda, *Phytochemistry*, 1994, **35**, 835–839.
- 2 K. Naoki, K. Nabeta and H. Matsuura, *Biosci. Biotechnol. Biochem.*, 2009, **73**, 1890–1892.
- 3 R. Takei, K. Takahashi, H. Matsuura and K. Nabeta, *Biosci. Biotechnol. Biochem. ISSN*, 2008, **8451**, 2069–2073.
- 4 H. Matsuura, N. Obara, N. Chisaka, A. ICHIHARA and T. Yoshihara, *Biosci. Biotechnol. Biochem.*, 1998, **62**, 2460–2462.
- 5 K. Sakai, M. Iwatsuki, M. Iizuka, Y. Asami, K. Nonaka, R. Masuma, M. Takizawa, T. Nakashima, T. Tokiwa, K. Shiomi and S. Ōmura, *J. Antibiot. (Tokyo).*, 2021, **74**, 363–369.
- 6 C. Félix, M. M. Salvatore, M. Dellagreca, R. Meneses, A. S. Duarte, F. Salvatore, D. Naviglio, M. Gallo, J. V. Jorrín-Novó, A. Alves, A. Andolfi and A. C. Esteves, *Mycologia*, 2018, **110**, 642–653.
- 7 W. Wei, N. Jiang, Y. N. Mei, Y. L. Chu, H. M. Ge, Y. C. Song, S. W. Ng and R. X. Tan, *Phytochemistry*, 2014, **100**, 103–109.
- 8 S. Khruengchai, P. Pripdeevech, C. Tanapichatsakul, W. C. Sum, M. A. A. Ibrahim, M. Stadler and S. S. Ebada, *RSC Adv.*, 2023, **13**, 19373–19378.
- 9 C. G. Kumar, P. Mongolla and S. Pombala, *Process Biochem.*, 2018, **72**, 162–169.
- 10 M. C. Pires, N. de Gois Andriolo, B. R. P. Lopes, A. L. T. G. Ruiz, V. M. G. do Nascimento, K. A. Toledo and C. dos Santos, *BMC Complement. Med. Ther.*, 2023, **23**, 356.
- 11 M. A. Alves Da Cunha, J. A. Turmina, R. C. Ivanov, R. R. Barroso, P. T. Marques, E. A. I. Fonseca, Z. B. Fortes, R. F. H. Dekker, N. Khaper and A. M. Barbosa, *J. Ind. Microbiol. Biotechnol.*, 2012, **39**, 1179–1188.
- 12 S. F. Mendes, O. dos Santos, A. M. Barbosa, A. F. D. Vasconcelos, G. Aranda-Selverio, N. K. Monteiro, R. F. H. Dekker, M. S. Pereira, A. M. F. Tovar, P. A. d. S. Mourão and M. de L. C. da Silva, *Int. J. Biol. Macromol.*, 2009, **45**, 305–309.
- 13 C. C. B. O. Miranda, R. F. H. Dekker, J. M. Serpeloni, E. A. I. Fonseca, I. M. S. Cólus and A. M. Barbosa, *Int. J. Biol. Macromol.*, 2008, **42**, 172–177.
- 14 C. C. B. O. Miranda-Nantes, E. A. I. Fonseca, C. T. B. V. Zaia, R. F. H. Dekker, N. Khaper, I. A. Castro and A. M. Barbosa, *Mycobiology*, 2011, **39**, 187–193.
- 15 B. B. C. Weng, Y. C. Lin, C. W. Hu, M. Y. Kao, S. H. Wang, D. Y. Lo, T. Y. Lai, L. S. Kan and R. Y. Y. Chiou, *Food Chem. Toxicol.*, 2011, **49**, 910–916.
- 16 C. C. Uranga, J. Beld, A. Mrse, I. Córdova-Guerrero, M. D. Burkart and R. Hernández-Martínez, *Biochem. Biophys. Res. Commun.*, 2016, **472**, 339–345.
- 17 Y. Que, D. Huang, S. Gong, X. Zhang, B. Yuan, M. Xue, W. Shi, F. Zeng, M. Liu, T. Chen, D. Yu, X. Yan, Z. Wang, L. Yang and L. Xiang, *Front. Cell. Infect. Microbiol.*, 2022, **12**, 898500.
- 18 S. Purbaya, S. E. Sinaga, W. Safriansyah, A. P. Wulandari, D. Harneti, Y. Mulyani, A. Azhari, K. Farabi, F. F. Abdullah and U. Supratman, *J. Biol. Act. Prod. from Nat.*, 2024, **14**, 443–454.
- 19 V. Rukachaisirikul, J. Arunpanichlert and Y. Sukpondma, *Tetrahedron*, 2009, **65**, 10590–10595.
- 20 C. O. Adetunji, J. K. Oloke, M. Pradeep, A. P. Oluyori, R. S. Jolly and O. M. Bello, *Beni-Suef Univ. J. Basic Appl. Sci.*, 2018, **7**, 505–510.
- 21 M. Saraswathi, S. H. Meshram, B. Siva, S. Misra and K. Suresh Babu, *Lett. Appl. Microbiol.*, 2022, **75**, 1475–1485.
- 22 A. Husain, A. Ahmad and K. Agrawal, *J. Nat. Prod.*, 1993, **56**, 2008–2011.
- 23 A. Andolfi, S. Basso, S. Giambra, G. Conigliaro, S. Lo Piccolo, A. Alves and S. Burruano, *Chem. Biodivers.*, 2016, **13**, 395–402.
- 24 A. Andolfi, L. Maddau, A. Cimmino, B. T. Linaldeddu, S. Basso, A. Deidda, S. Serra and A. Evidente, *Phytochemistry*, 2014, **103**, 145–153.
- 25 S. R. Gupta, R. R. Chandran and P. V. Divekar, *Indian J. Exp. Biol.*, 1966, **4**, 152–153.
- 26 C. Félix, M. M. Salvatore, M. DellaGreca, V. Ferreira, A. S. Duarte, F. Salvatore, D. Naviglio, M. Gallo, A. Alves, A. C. Esteves and A. Andolfi, *Mycologia*, 2019, **111**, 466–476.
- 27 S. Kumar, A. D. Pagar, F. Ahmad, V. Dwibedi, A. Wani, P. V. Bharatam, M. Chhibber, S. Saxena and I. Pal Singh, *Bioorg. Chem.*, 2019, **87**, 851–856.
- 28 G. He, H. Matsuura and T. Yoshihara, *Phytochemistry*, 2004, **65**, 2803–2807.
- 29 W. Dong, W. Bin Gao, F. W. Liu, Jin-Ye, Y. Chen, H. L. Zhang, Z. Lv, L. N. Guo and B. Song, *Phytochem.*

- Letts.*, 2023, **56**, 81–83.
- 30 Elfita, R. Oktiansyah, Mardiyanto, H. Widjajanti, A. Setiawan and S. S. A. Nasution, *Biointerface Res. Appl. Chem.*, DOI:10.33263/BRIAC136.530.
- 31 W. Jampanya, C. Boonlarpradab, C. Srisuksam, S. Samipak and A. Amnuaykanjanasin, *Crop Prot.*, 2025, **188**, 107029.
- 32 S. Chen, D. Chen, R. Cai, H. Cui, Y. Long, Y. Lu, C. Li and Z. She, *J. Nat. Prod.*, 2016, **79**, 2397–2402.
- 33 Y. Liang, Q. Li, Y. Li, Y. Zheng, Y. Shen, H. Yang, Y. Lu, J. Liu and Q. Zhou, *J. Nat. Prod.*, 2023, **86**, 18–23.
- 34 X. Lü, G. Chen, Z. Li, Y. Zhang, Z. Wang, W. Rong, Y. Pei, H. Pan, H. Hua and J. Bai, *Helv. Chim. Acta*, 2014, **97**, 1289–1294.
- 35 N. Kamal, C. V. Viegelmann, C. J. Clements and R. A. Edrada-Ebel, *Planta Med.*, 2016, **83**, 565–573.
- 36 H. Luo, S. Meng, Y. Deng, Z. Deng and H. Shi, *Arch. Microbiol.*, 2023, **205**, 140.
- 37 R. yun Yang, C. yuan Li, Y. cheng Lin, G. tian Peng, Z. gang She and S. ning Zhou, *Bioorganic Med. Chem. Lett.*, 2006, **16**, 4205–4208.
- 38 Q. Yang, M. Asai, H. Matsuura and T. Yoshihara, *Phytochemistry*, 2000, **54**, 489–494.
- 39 H. Matsuura, K. Nakamori, E. A. Omer, C. Hatakeyama, T. Yoshihara and A. Ichihara, *Phytochemistry*, 1998, **49**, 579–584.
- 40 P. Li, K. Takahashi, H. Matsuura and T. Yoshihara, *Biosci. Biotechnol. Biochem.*, 2005, **69**, 1610–1612.
- 41 P. Paranagama, S. Santhirasegaram, S. Wickramarachchi and R. N. Attanayake, *Asian J. Chem.*, 2022, 10–14.
- 42 J. Huang, J. Xu, Z. Wang, D. Khan, S. I. Niaz, Y. Zhu, Y. Lin, J. Li and L. Liu, *Nat. Prod. Res.*, 2017, **31**, 326–332.
- 43 B. O. Umeokoli, W. Ebrahim, M. El-Neketi, W. E. G. Müller, R. Kalscheuer, W. Lin, Z. Liu and P. Proksch, *Nat. Prod. Res.*, 2019, **33**, 2215–2222.
- 44 Y. Shiono, S. Sato, F. F. Sofian, T. Koseki, F. F. Abdullah, S. Salam, D. Harneti, R. Maharani and U. Supratman, *Phytochem. Lett.*, 2021, **44**, 1–6.
- 45 S. Chen, Z. Liu, H. Liu, Y. Long, D. Chen, Y. Lu and Z. She, *Org. Biomol. Chem.*, 2017, **15**, 6338–6341.
- 46 S. Sato, F. F. Sofian, W. Suehiro, D. Harneti, R. Maharani, U. Supratman, F. F. Abdullah, S. Salam, T. Koseki and Y. Shiono, *Chem. Biodivers.*, 2021, **18**, 1–14.
- 47 J. Li, Y. Xue, J. Yuan, Y. Lu, X. Zhu, Y. Lin and L. Liu, *Nat. Prod. Res.*, 2016, **30**, 755–760.
- 48 W. Seemakram, J. Paluka, T. Suebrasri, C. Lapjit, S. Kanokmedhakul, F. T. Schevenels and S. Boonlue, *Rhizosphere*, 2024, **29**, 100853.
- 49 S. Purbaya, D. Harneti, A. P. Wulandari, Y. Mulyani, A. Azhari, A. P. Sari and U. Supratman, *Molekul*, 2023, **18**, 396–403.
- 50 Y. Liang, L. Li, Y. Shen, Y. Zheng, Q. Li, Q. Tong, Q. Zhou, X. N. Li, D. Li, H. Zhu, W. Sun, C. Chen and Y. Zhang, *Phytochemistry*, 2022, **201**, 113248.
- 51 M. Pandi, R. Manikandan and J. Muthumary, *Biomed. Pharmacother.*, 2010, **64**, 48–53.
- 52 M. Pandi, R. S. Kumaran, Y. K. Choi, H. J. Kim and J. Muthumary, *African J. Biotechnol.*, 2011, **10**, 1428–1435.
- 53 R. Venkatachalam, K. Subban and M. J. Paul, *J. Biotechnol.*, 2008, **136**, S189–S190.
